# Supplementary material
Source: publisher site journal article supplement (https://www.dovepress.com/article/294282)
Supplement: Supplementary file 1 [file get_supplementary_file.php]

Supplemental Table S1. Antimicrobial susceptibility results and microbiological features of CRE pathogens.

|  | No. of susceptible pathogens / no. of pathogens tested, % | | | | | | | | |
| --- | --- | --- | --- | --- | --- | --- | --- | --- | --- |
|  | All strains | By organism | | | | | By carbapenemase production | | |
| Antimicrobial | *K. pneumoniae* | *E. coli* | | *E. cloacae* | | | KPC-2 | NDM-1/3/5 |
|  | n=190 | n=163 | n=18 | | n=7 | | | n=142 | n=34 |
| Meropenem  Imipenem  Ertapenem  Colistin Tigecycline  Amikacin  Aztreonam  Cefoperazone/  sulbactam  Cefepime  Cefoxitin  Cefotaxime  Ceftazidime  Ceftriaxone  Ciprofloxacin  Levofloxacin  Piperacillin/  tazobactam | 4/190, 2.1%  6/190, 3.2%  1/190, 0.5%  177/190, 93.2%  175/190, 92.1%  66/190, 34.7%  13/190, 6.8%  2/190, 1.1%  3/190, 1.6%  0/190, 0%  0/190, 0%  1/190, 0.5%  0/190, 0%  7/190, 3.7%  9/190, 4.7%  2/190, 1.1% | 2/163, 1.2%  3/163, 1.8%  0/163, 0%  154/163, 94.5%  151/163, 92.6%  46/163, 28.2%  9/163, 5.5%  1/163, 0.6%  2/163, 1.2%  0/163, 0%  0/163, 0%  1/163, 0.6%  0/163, 0%  4/163, 2.5%  5/163, 3.1%  1/163, 0.6% | 2/18, 11.1%  2/18, 11.1%  1/18, 5.6%  15/18, 83.3%  18/18, 100%  13/18, 72.2%  2/18, 11.8%  1/18, 5.9%  0/18, 0%  0/18, 0%  0/18, 0%  0/18, 0%  0/18, 0%  0/18, 0%  0/18, 0%  1/18, 5.6% | 0/7, 0%  1/7, 14.3%  0/7, 0%  6/7, 85.7%  5/7, 71.4%  6/7, 85.7%  2/17, 28.6%  0/7, 0%  1/7, 14.3%  0/7, 0%  0/7, 0%  0/7, 0%  0/7, 0%  2/7, 28.6%  3/7, 42.9%  11/7, 4.3% | | 0/142, 0%  1/142, 0.7%  0/142, 0%  135/142, 95.1%  134/142, 94.4%  27/142, 19.0%  0/142, 0%  0/142, 0%  0/142, 0%  0/142, 0%  0/142, 0%  0/142, 0%  0/142, 0%  0/142 0%  0/142 0%  0/142, 0% | | | 0/34, 0%  1/34, 0%  0/34, 0%  29/34, 85.3%  31/34, 91.2%  30/34, 88.2%  12/34, 35.3%  0/34, 0%  0/34, 0%  0/34, 0%  0/34, 0%  0/34, 0%  0/34, 0%  0/34, 0%  5/34, 14.7%  0/34, 0% |
| Minocycline | 65/190, 34.2% | 56/163, 34.4% | 5/18, 27.8% | 3/7, 42.9% | | 47/142, 33.1% | | | 13/34, 38.2% |

KPC: *K. pneumoniae* carbapenemase, NDM: New Delhi metallo-β-lactamase.

Supplemental Table S2. Baseline Characteristics of 105 patients with CRE BSIs received different antimicrobial duration before and after PSM.

| Variable | Before PSM | | | | P value | | After PSM | | P value | |
| --- | --- | --- | --- | --- | --- | --- | --- | --- | --- | --- |
| Short - duration  n = 48 (%) | | Long - duration  n = 57 (%) | (univariate) | | Short - duration  n = 48 (%) | | Long - duration  n = 48 (%) | (univariate) | |
| **Patients conditions**  Age, median (IQR)  Male sex  Charlson comorbidity index, median (IQR)  **CRE organisms and resistance mechanism**  Klebsiella pneumoniae  KPC  NDM  ST-11  K64  Virulence genes  **AST profiles of BSI with CRE**  Colistin MIC ≥ 4 mg/L  Meropenem MIC ≥ 8 mg/L  Tigecycline MIC ≥ 0.5 mg/L  **Epidemiology**  ICU at time of BSI onset  Time to initiation of BSI  Hospital acquired  **Invasive procedures (≤ 30d)**  Arterial cannula  Central venous catheter  Tracheal cannula  Tracheotomy  Urinary catheter  Gastric tube  History of surgery in prior 1 year  History of critical care in prior 1 year  **Exposure to antimicrobial** (≤ 30d)  Third- or fourth-generation cephalosporins  Empirical using carbapenems  Empirical using tigecycline  **Acute severity**  Pitt bacteremia score, median (IQR)  APACHE II score, mean (SD)  **Antibiotic treatment**  Early appropriate therapy  Appropriate empirical therapy  Time to initiation of at least one active drug (h) | 56.0 (44.0 – 68.0)  30/48 (62.5)  2.0 (1.0 – 3.0)  42/48 (87.5)  33/48 (68.8)  10/48 (20.8)  30/48 (62.5)  16/48 (33.3)  1.5 (0 – 2.0)  3/48 (6.3)  39/48 (81.3)  41/48 (85.4)  30/48 (62.5)  14.5 (6.3 – 23.0)  42/48 (87.5)  13/48 (27.1)  25/48 (52.1)  20/48 (41.7)  12/48 (25.0)  23/48 (47.9)  21/48 (43.8)  17/48 (35.4)  24/48 (50.0)  43/48 (89.6)  14/48 (29.2)  24/48 (50.0)  22/48 (45.8)  1.5 (0 – 3.8)  11.7  34/48 (70.8)  28/48 (58.3)  48.0 (24.0 – 72.0) | 54.0 (40.0 – 67.0)  45/57 (78.9)  1.0 (0 – 3.0)  48/57 (84.2)  44/57 (77.2)  9/57 (15.8)  40/57 (70.2)  19/57 (33.3)  2.0 (0 – 2.0)  7/57 (12.3)  51/57 (89.5)  45/57 (78.9)  38/57 (66.7)  12.0 (5.0 – 20.0)  47/57 (82.5)  12/57 (21.1)  27/57 (47.4)  31/57 (54.4)  17/57 (29.8)  19/57 (33.3)  25/57 (43.9)  20/57 (35.1)  31/57 (54.4)  53/57 (93.0)  13/57 (22.8)  24/57 (42.1)  31//57 (54.4)  2.0 (1.0 - 4.0)  12.4  46/57 (80.7)  37/57 (64.9)  48.0 (24.0 – 72.0) | | | 0.837  0.063  0.323  0.631  0.330  0.504  0.406  1.000  0.745  0.475  0.230  0.391  0.656  0.704  0.474  0.470  0.630  0.194  0.582  0.129  0.991  0.972  0.654  0.535  0.458  0.419  0.383  0.215  **0.045**  0.237  0.489  0.412 | 56.0 (44.0 – 68.0)  30/48 (62.5)  2.0 (1.0 – 3.0)  42/48 (87.5)  33/48 (68.8)  10/48 (20.8)  30/48 (62.5)  16/48 (33.3)  1.5 (0 – 2.0)  3/48 (6.3)  39/48 (81.3)  41/48 (85.4)  30/48 (62.5)  14.5 (6.3 – 23.0)  42/48 (87.5)  13/48 (27.1)  25/48 (52.1)  20/48 (41.7)  12/48 (25.0)  23/48 (47.9)  21/48 (43.8)  17/48 (35.4)  24/48 (50.0)  43/48 (89.6)  14/48 (29.2)  24/48 (50.0)  22/48 (45.8)  1.5 (0 – 3.8)  11.7  34/48 (70.8)  28/48 (58.3)  48.0 (24.0 – 72.0) | | 55.0 (38.5 – 65.5)  39/48 (81.3)  1.0 (0 – 3.0)  42/48 (87.5)  38/48 (79.2)  7/48 (14.6)  35/48 (72.9)  16/48 (33.3)  2.0 (0 – 2.0)  5/48 (10.4)  43/48 (89.6)  40/48 (83.3)  34/48 (62.5)  12.5 (5.0 – 20.8)  41/48 (85.4)  12/48 (25.0)  22/48 (45.8)  30/48 (62.5)  14/48 (29.2)  16/48 (33.3)  22/48 (45.8)  16/48 (33.3)  21/48 (43.8)  46/48 (95.8)  11/48 (22.9)  19/48 (39.6)  29/48 (60.4)  2.0 (1.0 – 4.0)  12.1  40/48 (83.3)  34/48 (70.8)  36.0 (24.0 – 72.0) | | 0.812  **0.041**  0.273  1.000  0.245  0.423  0.275  1.000  0.662  0.712  0.247  0.779  0.386  0.924  0.765  0.816  0.540  **0.041**  0.646  0.146  0.837  0.830  0.539  0.239  0.485  0.305  0.152  0.236  **0.037**  0.145  0.200  0.297 |

PSM: propensity score matching, CRE: Carbapenem-resistant *Enterobactereales*, BSIs: bloodstream infections, IQR: interquartile range, KPC: *K. pneumoniae* carbapenemase, NDM: New Delhi metallo-β-lactamase, MLST: multilocus sequence typing, AST: antimicrobial susceptibility testing, BSI: bloodstream infection, ICU: intensive care unit, APACHE II: Acute Physiology and Chronic Health Evaluation II.

Figure S1. The 30-day mortality of patients with sepsis, septic shock and non-sepsis.
